# Supplementary material for: Conrad Martens : journal of a voyage from England to Australia aboard HMS Beagle and HMS Hyacinth 1833-35
Source: Royal Society of Chemistry journal article supplement (doi:10.1039/d2dt01130a), 1994-01-01
Supplement: d2dt01130a1.pdf [file d2dt01130a1.pdf]

## Supplementary Information

### **Coupled Nickel-Cobalt Nanoparticles/N,P,S-co-doped Carbon Hybrid Nanocages with High Performance for Catalysis and Protein Adsorption**

Yanchun Xie<sup>a</sup>, Jing Zheng<sup>a</sup>, Suping Han<sup>b\*</sup>, Jingli Xu<sup>a</sup>, Xue-Bo Yin<sup>a</sup>, Min Zhang<sup>a\*</sup>

<sup>a</sup>College of Chemistry and Chemical Engineering, Shanghai University of Engineering Science, Shanghai 201620, PR China.

<sup>b</sup>School of Chemistry and Pharmaceutical Engineering, Qilu University of Technology (Shandong Academy of Sciences), Jinan 250353, China.

\* *Corresponding authors.*

[zhangmin@sues.edu.cn](mailto:zhangmin@sues.edu.cn) (M. Zhang) [supinghan@163.com](mailto:supinghan@163.com) (S.P. Han)

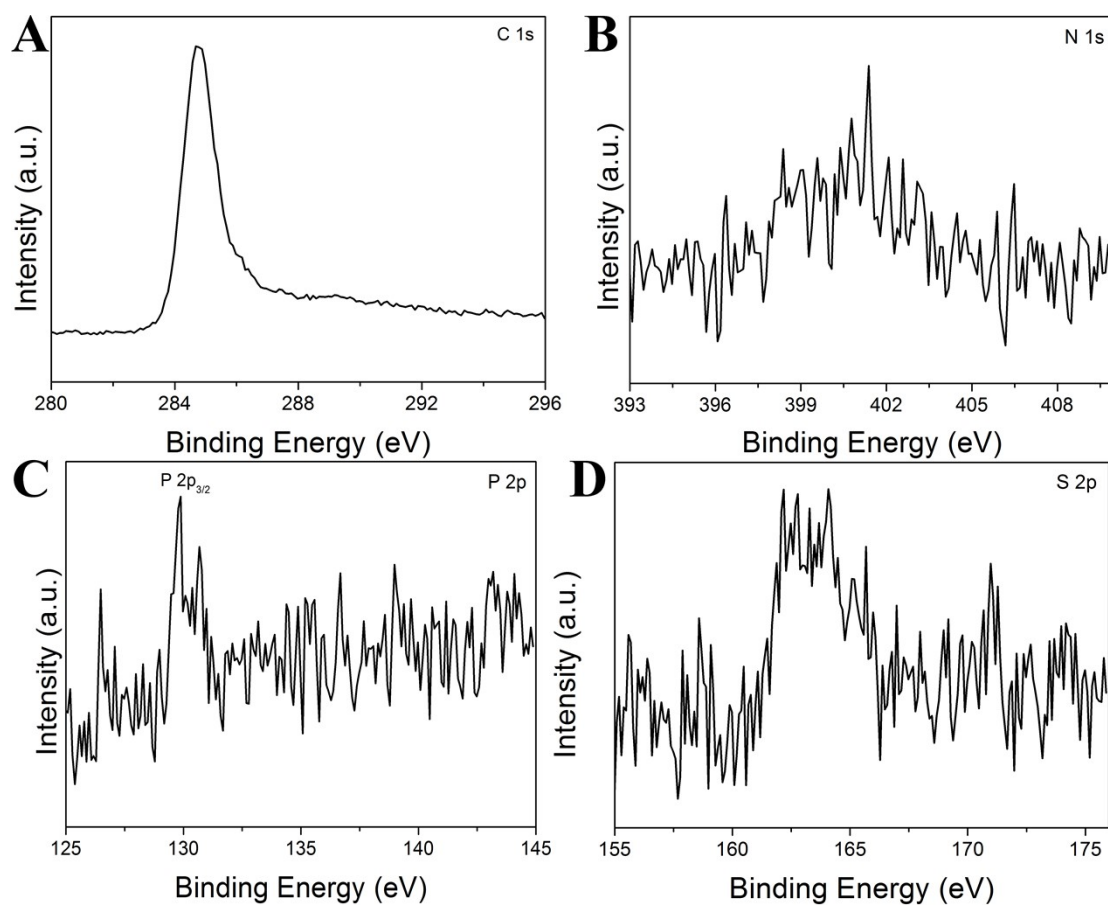

**Figure S1** (A-D) The XPS spectra of C 1s, N 1s, P 2p and S 2p of NiCo@NPSC-700

**Table S1.** Isotherm parameters for the adsorption of BHb on the NiCo@NPSC-700 nanocages

| Models           | Hollow                      | NiCo@NPSC-700 |
|------------------|-----------------------------|---------------|
| Langmuir model   | $K_d$ (L mg <sup>-1</sup> ) | 0.12          |
|                  | $Q_m$ (mg g <sup>-1</sup> ) | 1831.39       |
|                  | $R^2$                       | 0.9946        |
|                  | n                           | 1.22          |
| Freundlich model | $K_f$ (mg/g)                | 19.81         |
|                  | $R^2$                       | 0.9390        |
